# Supplementary material
Source: PubMed Central journal article supplement (PMC7504963)
Supplement: IAI.00257-20-s0002.pdf [file IAI.00257-20-s0002.pdf]

**S1 Table: Histopathological description of the spleen of the animals used in the study.**

| <b>Spleen</b>              | <b>Score</b> | <b>Description</b>                          |
|----------------------------|--------------|---------------------------------------------|
| Inflammation (macrophages) | 0            | None                                        |
|                            | 1            | Minimal—One focus per 4x objective          |
|                            | 2            | Mild—Two to four foci per 4x objective      |
|                            | 3            | Moderate—Five to 10 foci per 4x objective   |
|                            | 4            | Marked—>10 per 4x objective                 |
| Neutrophilic accumulation  | 0            | None                                        |
|                            | 1            | Minimal— few cells identified               |
|                            | 2            | Mild—multiple small foci <10 cells          |
|                            | 3            | Moderate—1-2 foci of >10 cells              |
|                            | 4            | Marked—Multiple foci of >10 cells           |
| Necrosis                   | 0            | None                                        |
|                            | 1            | Minimal—one focus per 10x objective         |
|                            | 2            | Mild—Two to four foci per 10x objective     |
|                            | 3            | Moderate—Five to ten foci per 10x objective |
|                            | 4            | Marked— >10 foci per 10x objective          |
